# Supplementary material
Source: Springer Nature journal article supplement (https://www.springermedizin.de/resource/supplementary/12984_2009_224_MOESM1_ESM.pdf/9605562)

**A**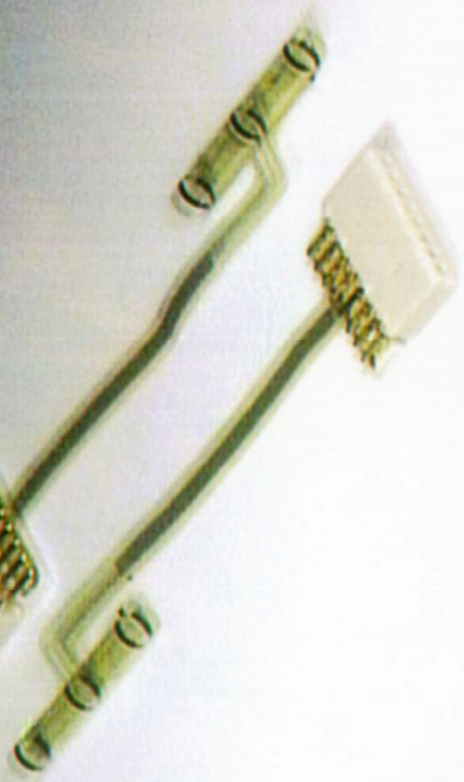**B**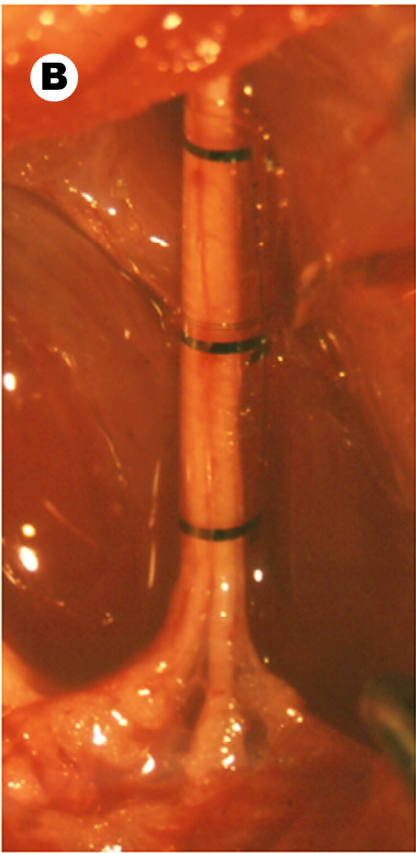

Supplement: MOESM1 [file 9605562]
